# Supplementary material for: Use of the Biphasic 13C-Sucrose/Glucose Breath Test to Assess Sucrose Maldigestion in Adults with Functional Bowel Disorders
Source: PubMed Central journal article supplement (PMC4992795; doi:10.1155/2016/7952891), 2016-08-08
Supplement: 7952891.f1.pdf [file 7952891.f1.pdf]

**Supplement Table 1 (Primary Data Set).** The  $^{13}\text{CO}_2$  Enrichment Coefficient of Glucose Oxidation for  $^{13}\text{C}$ -Sucrose (CGO-S) values obtained at 60 minutes, 75 minutes and the mean 60-75 minute values are tabulated for all adult subjects diagnosed with functional bowel disorder (left) and asymptomatic controls (right), N=11 each. The CGO-S value is the ratio of enrichment (*delta over the baseline*) derived from digestion and oxidation of  $^{13}\text{C}$ -Sucrose (25 mg.) and from the oxidation of  $^{13}\text{C}$ -glucose (super dose 125mg) divided by 5. Diagnostic cut-off values for each time point were determined from the 95% confidence interval lower-limit.

| Adults with Functional Bowel Disorder Subject # | Age   | BMI   | $^{13}\text{CO}_2$ Enrichment Coefficient of Glucose Oxidation for $^{13}\text{C}$ -Sucrose at 60' | $^{13}\text{CO}_2$ Enrichment Coefficient of Glucose Oxidation for $^{13}\text{C}$ -Sucrose at 75' | $^{13}\text{CO}_2$ Enrichment Coefficient of Glucose Oxidation for $^{13}\text{C}$ -Sucrose at 60'-75' Mean | Adult Control Subject # | Age   | BMI   | $^{13}\text{CO}_2$ Enrichment Coefficient of Glucose Oxidation for $^{13}\text{C}$ -Sucrose at 60' | $^{13}\text{CO}_2$ Enrichment Coefficient of Glucose Oxidation for $^{13}\text{C}$ -Sucrose at 75' | $^{13}\text{CO}_2$ Enrichment Coefficient of Glucose Oxidation for $^{13}\text{C}$ -Sucrose at 60'-75' Mean |
|-------------------------------------------------|-------|-------|----------------------------------------------------------------------------------------------------|----------------------------------------------------------------------------------------------------|-------------------------------------------------------------------------------------------------------------|-------------------------|-------|-------|----------------------------------------------------------------------------------------------------|----------------------------------------------------------------------------------------------------|-------------------------------------------------------------------------------------------------------------|
| FBD-1                                           | 46.3  | 18.88 | 0.77                                                                                               | 0.83                                                                                               | 0.80                                                                                                        | ACS-1                   | 60.8  | 29.83 | 1.00                                                                                               | 0.92                                                                                               | 0.96                                                                                                        |
| FBD-2                                           | 29.4  | 25.06 | 0.57                                                                                               | 0.57                                                                                               | 0.57                                                                                                        | ACS-2                   | 53.2  | 21.45 | 1.10                                                                                               | 0.94                                                                                               | 1.02                                                                                                        |
| FBD-3                                           | 29.6  | 28.17 | 0.87                                                                                               | 0.84                                                                                               | 0.86                                                                                                        | ACS-3                   | 22.9  | 19.15 | 0.90                                                                                               | 0.82                                                                                               | 0.86                                                                                                        |
| FBD-4                                           | 51.6  | 41.81 | 1.32                                                                                               | 1.35                                                                                               | 1.33                                                                                                        | ACS-4                   | 57.4  | 27.13 | 0.74                                                                                               | 0.82                                                                                               | 0.78                                                                                                        |
| FBD-5                                           | 24    | 31.32 | 0.79                                                                                               | 0.72                                                                                               | 0.76                                                                                                        | ACS-5                   | 22.8  | 21.56 | 1.47                                                                                               | 1.24                                                                                               | 1.36                                                                                                        |
| FBD-6                                           | 47.1  | 35.43 | 0.58                                                                                               | 0.78                                                                                               | 0.68                                                                                                        | ACS-6                   | 22.8  | 18.56 | 0.89                                                                                               | 0.75                                                                                               | 0.82                                                                                                        |
| FBD-7                                           | 66    | 25.79 | 0.55                                                                                               | 0.58                                                                                               | 0.57                                                                                                        | ACS-7                   | 24.6  | 18.74 | 0.91                                                                                               | 0.96                                                                                               | 0.94                                                                                                        |
| FBD-8                                           | 60.3  | 32.54 | 1.13                                                                                               | 1.39                                                                                               | 1.26                                                                                                        | ACS-8                   | 32.2  | 21.18 | 1.07                                                                                               | 0.77                                                                                               | 0.92                                                                                                        |
| FBD-9                                           | 33.9  | 24.45 | 0.92                                                                                               | 0.77                                                                                               | 0.84                                                                                                        | ACS-9                   | 25.6  | 22.27 | 0.92                                                                                               | 0.93                                                                                               | 0.93                                                                                                        |
| FBD-10                                          | 28.7  | 24.56 | 0.83                                                                                               | 0.75                                                                                               | 0.79                                                                                                        | ACS-10                  | 53.3  | 25.05 | 0.94                                                                                               | 0.89                                                                                               | 0.91                                                                                                        |
| FBD-11                                          | 49.8  | 20.34 | 0.47                                                                                               | 0.46                                                                                               | 0.46                                                                                                        | ACS-11                  | 50.6  | 23.79 | 1.03                                                                                               | 0.90                                                                                               | 0.97                                                                                                        |
| Mean                                            | 42.43 | 28.03 | 0.80                                                                                               | 0.82                                                                                               | 0.81                                                                                                        | Mean                    | 38.75 | 22.61 | 1.00                                                                                               | 0.90                                                                                               | 0.95                                                                                                        |
| STD Dev                                         | 14.09 | 6.76  | 0.26                                                                                               | 0.29                                                                                               | 0.27                                                                                                        | STD Dev                 | 16.03 | 3.58  | 0.19                                                                                               | 0.13                                                                                               | 0.15                                                                                                        |
| STD_ERR                                         |       |       | 0.08                                                                                               | 0.09                                                                                               | 0.08                                                                                                        | STD_ERR                 |       |       | 0.06                                                                                               | 0.04                                                                                               | 0.05                                                                                                        |
| 95%CI                                           |       |       | 0.80±0.16+                                                                                         | 0.82±0.18                                                                                          | 0.81±0.16                                                                                                   | 95%CI                   |       |       | 1.00±0.12                                                                                          | 0.90±0.08                                                                                          | 0.95±0.10                                                                                                   |
|                                                 |       |       |                                                                                                    |                                                                                                    |                                                                                                             | Lower Limit Cutoff      |       |       | 0.87                                                                                               | 0.82                                                                                               | 0.85                                                                                                        |
